# Supplementary material for: Structural tuning of diclofenac for enhanced medicinal efficacy and reduced adverse effects: an integrating computational validation
Source: Royal Society of Chemistry journal article supplement (doi:10.1039/d6ra01053a), 2026-05-06
Supplement: d6ra01053a1.pdf [file d6ra01053a1.pdf]

## Structural Tuning of Diclofenac for Enhanced Medicinal Efficacy and Reduced Adverse Effects: An Integrating Computational Validation

Ibrahim Khalil <sup>a, b, g</sup>, Sadia Zaman <sup>a, c</sup>, Ishrat Jahan Aliza <sup>a, d</sup>, Marjia Rahman Tanny <sup>a, e</sup>, Tasnim Hasan <sup>a, f</sup>,  
Monir Uzzaman <sup>a, d</sup>

<sup>a</sup> Department of Drug Design, Computer in Chemistry and Medicine Laboratory, Dhaka, Bangladesh

<sup>b</sup> Faculty of Science, Department of Applied Chemistry and Chemical Engineering, University of Chittagong, Chittagong-4331, Bangladesh

<sup>c</sup> School of Health & Life Sciences, Department of Pharmaceutical Sciences, North South University, Dhaka-1229, Bangladesh

<sup>d</sup> Faculty of Science, Department of Chemistry, University of Chittagong, Chittagong - 4331, Bangladesh

<sup>e</sup> Faculty of Science, Department of Pharmacy, Comilla University, Comilla, 3506, Bangladesh

<sup>f</sup> Faculty of Science, Department of Chemistry, Barishal University, Barishal-8254, Bangladesh

<sup>g</sup> Faculty of Engineering, Department of Basic Science, World University of Bangladesh, Dhaka-1230, Bangladesh

\*Correspondence: [monircu92@gmail.com](mailto:monircu92@gmail.com)

| <b>Table of Contents</b> |                                                               | Page No. |
|--------------------------|---------------------------------------------------------------|----------|
| 1                        | Structure details of all compounds                            | S2       |
| 2                        | Thermodynamics data                                           | S4       |
| 3                        | Frontier molecular orbital analysis                           | S5       |
| 4                        | MEP map of all compounds                                      | S7       |
| 5                        | FT-IR spectra of DCF and its rest analogues                   | S7       |
| 6                        | Vibrational frequencies of all compounds                      | S8       |
| 7                        | Electronic absorption of DCF and its newly designed analogs   | S9       |
| 8                        | Binding affinity and nonbonding interactions of all compounds | S10      |
| 8                        | Solvent accessible surface area of some DCF analogues         | S13      |
| 9                        | Drug likeness parameters of DCF analogues                     | S14      |
| 10                       | Quantitative structure-activity relationship study            | S15      |

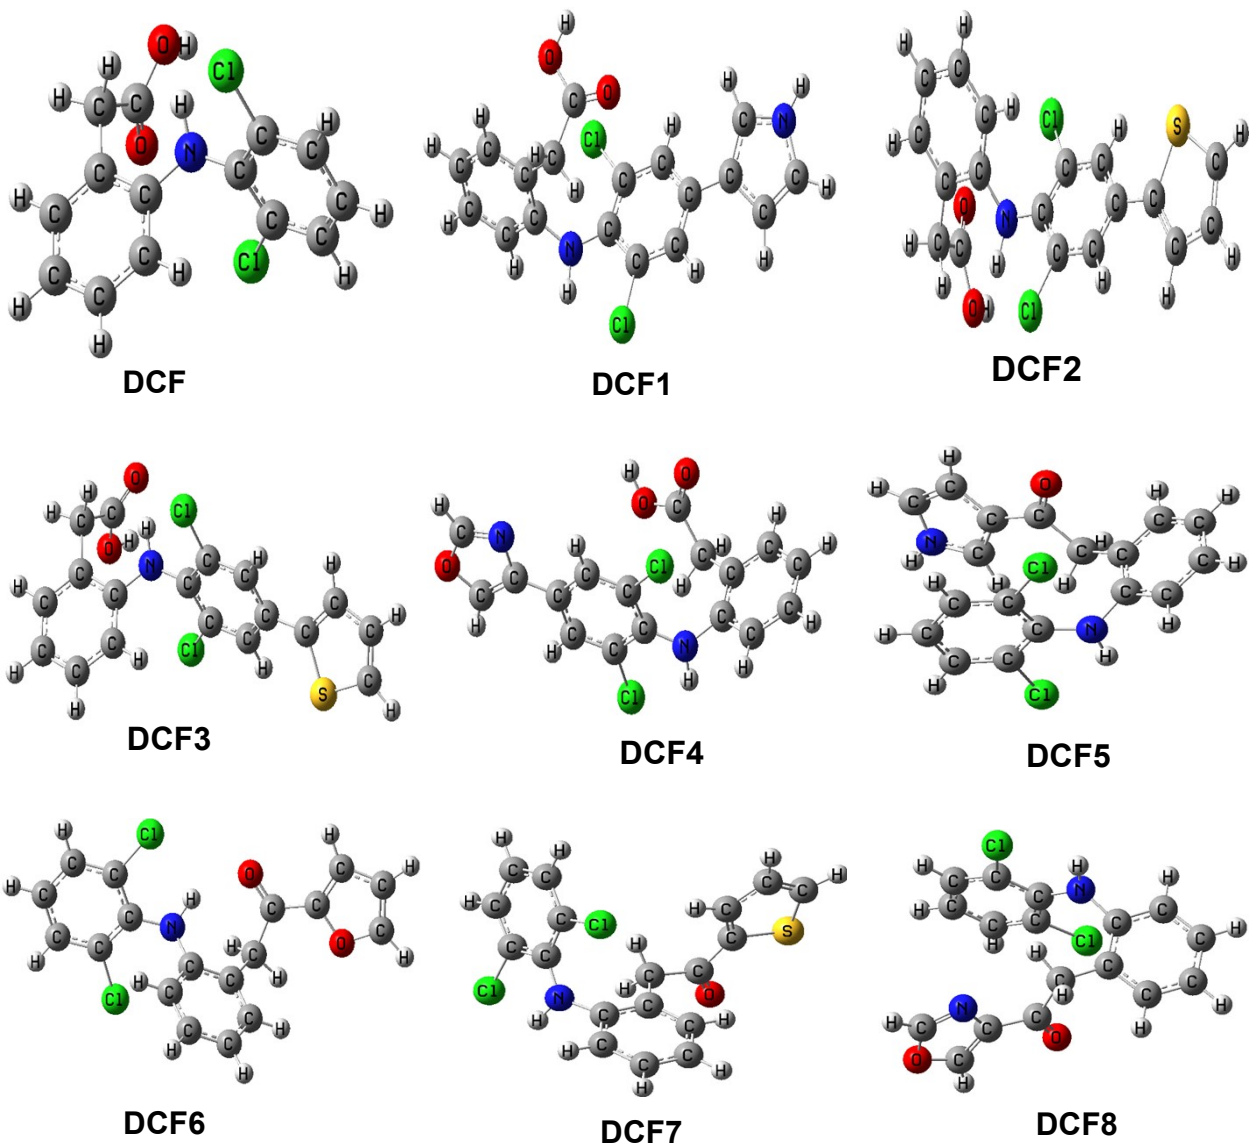

Figure S1 Most stable optimized structures of DCF and its derivatives obtained from DFT calculations.

Table S1 Chemical name, molecular formula (MF), molecular weight (MW), and chemical structure of DCF and its derivatives.

| Name | Chemical name/<br>MF, MW(g/mol)                                                                                                                                       | Chemical structure |
|------|-----------------------------------------------------------------------------------------------------------------------------------------------------------------------|--------------------|
| DCF  | 2-(2-((2,6-dichlorophenyl) amino) phenyl) acetic acid<br>(C <sub>14</sub> H <sub>11</sub> Cl <sub>2</sub> NO <sub>2</sub> , 296.15)                                   |                    |
| DCF1 | 2-(2-((2,6-dichloro-4-(1H-pyrrol-3-yl) phenyl) amino) phenyl) acetic acid<br>(C <sub>18</sub> H <sub>14</sub> Cl <sub>2</sub> N <sub>2</sub> O <sub>2</sub> , 361.22) |                    |
| DCF2 | 2-(2-((2,6-dichloro-4-(furan-3-yl) phenyl) amino) phenyl) acetic acid<br>(C <sub>18</sub> H <sub>13</sub> Cl <sub>2</sub> NO <sub>3</sub> , 362.21)                   |                    |
| DCF3 | 2-(2-((2,6-dichloro-4-(thiophen-3-yl) phenyl) amino) phenyl) acetic acid<br>(C <sub>18</sub> H <sub>13</sub> Cl <sub>2</sub> NO <sub>2</sub> S, 378.27)               |                    |
| DCF4 | 2-(2-((2,6-dichloro-4-(oxazol-4-yl) phenyl) amino) phenyl) acetic acid<br>(C <sub>17</sub> H <sub>12</sub> Cl <sub>2</sub> N <sub>2</sub> O <sub>3</sub> , 363.19)    |                    |
| DCF5 | 2-(2-((2,6-dichlorophenyl) amino) phenyl)-1-(1H-pyrrol-3-yl) ethan-1-one<br>(C <sub>18</sub> H <sub>14</sub> Cl <sub>2</sub> N <sub>2</sub> O, 345.22)                |                    |
| DCF6 | 2-(2-((2,6-dichlorophenyl) amino) phenyl)-1-(furan-3-yl) ethan-1-one<br>(C <sub>18</sub> H <sub>13</sub> Cl <sub>2</sub> NO <sub>2</sub> , 346.21)                    |                    |

|      |                                                                                                                                                                   |                                                                                    |
|------|-------------------------------------------------------------------------------------------------------------------------------------------------------------------|------------------------------------------------------------------------------------|
| DCF7 | 2-(2-((2,6-dichlorophenyl) amino) phenyl)-1-(thiophen-3-yl) ethan-1-one<br>(C <sub>18</sub> H <sub>13</sub> Cl <sub>2</sub> NOS, 362.27)                          | 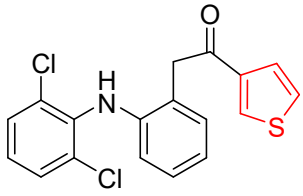 |
| DCF8 | 2-(2-((2,6-dichlorophenyl) amino) phenyl)-1-(oxazol-4-yl) ethan-1-one<br>(C <sub>17</sub> H <sub>12</sub> Cl <sub>2</sub> N <sub>2</sub> O <sub>2</sub> , 347.20) |  |

Table S2 Electronic energy (Hartree), enthalpy (Hartree), Gibbs free energy (Hartree), and dipole moment (Debye) of all compounds.

| Name | Electronic energy | Enthalpy | Gibbs free energy | Dipole moment |
|------|-------------------|----------|-------------------|---------------|
| DCF  | -1665.53          | -1665.53 | -1665.60          | 2.36          |
| DCF1 | -1874.45          | -1874.45 | -1874.52          | 2.15          |
| DCF2 | -2217.30          | -2217.29 | -2217.37          | 2.87          |
| DCF3 | -2217.30          | -2217.30 | -2217.37          | 1.68          |
| DCF4 | -1910.37          | -1910.37 | -1910.45          | 2.68          |
| DCF5 | -1799.20          | -1799.20 | -1799.28          | 5.31          |
| DCF6 | -1819.08          | -1819.08 | -1819.15          | 2.77          |
| DCF7 | -2142.05          | -2142.05 | -2142.12          | 3.57          |
| DCF8 | -1835.12          | -1835.12 | -1835.20          | 2.87          |

Table S3 Energy (eV) of *HOMOs*, *LUMOs*, gap, hardness ( $\eta$ ), softness ( $S$ ), chemical potential ( $\mu$ ), electronegativity ( $\chi$ ), and electrophilicity ( $\omega$ ) of all compounds.

| Name | $\epsilon_{HOMO}$ | $\epsilon_{LUMO}$ | Gap  | $\eta$ | $S$  | $\mu$ | $\chi$ | $\omega$ |
|------|-------------------|-------------------|------|--------|------|-------|--------|----------|
| DCF  | -5.94             | -1.09             | 4.85 | 2.42   | 0.20 | -3.51 | 3.52   | 2.54     |
| DCF1 | -5.43             | -0.91             | 4.51 | 2.25   | 0.22 | -3.17 | 3.17   | 2.23     |
| DCF2 | -5.81             | -1.72             | 4.09 | 2.04   | 0.24 | -3.76 | 3.76   | 3.46     |
| DCF3 | -5.76             | -3.25             | 2.51 | 1.25   | 0.40 | -4.50 | 4.50   | 8.10     |
| DCF4 | -5.87             | -1.40             | 4.47 | 2.23   | 0.22 | -3.63 | 3.63   | 2.95     |
| DCF5 | -5.93             | -1.15             | 4.77 | 2.38   | 0.21 | -3.54 | 3.54   | 2.63     |
| DCF6 | -5.67             | -2.16             | 3.51 | 1.76   | 0.28 | -3.91 | 3.91   | 4.34     |
| DCF7 | -6.08             | -2.14             | 3.94 | 1.97   | 0.25 | -4.11 | 4.11   | 4.28     |
| DCF8 | -5.98             | -1.83             | 4.14 | 2.07   | 0.24 | -3.90 | 3.90   | 3.67     |

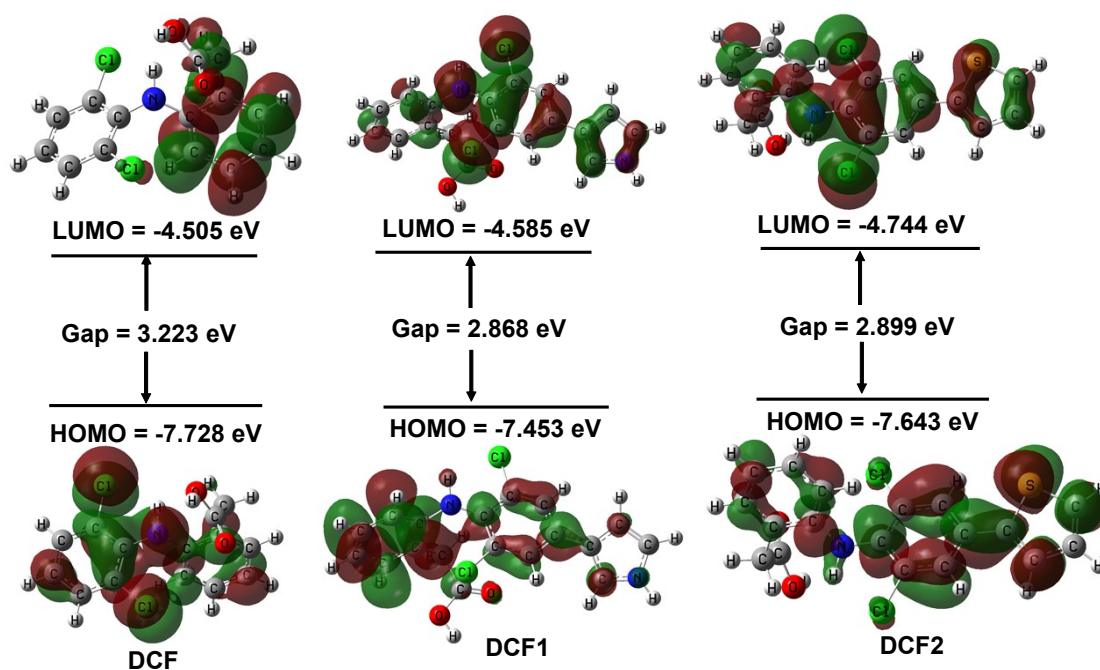

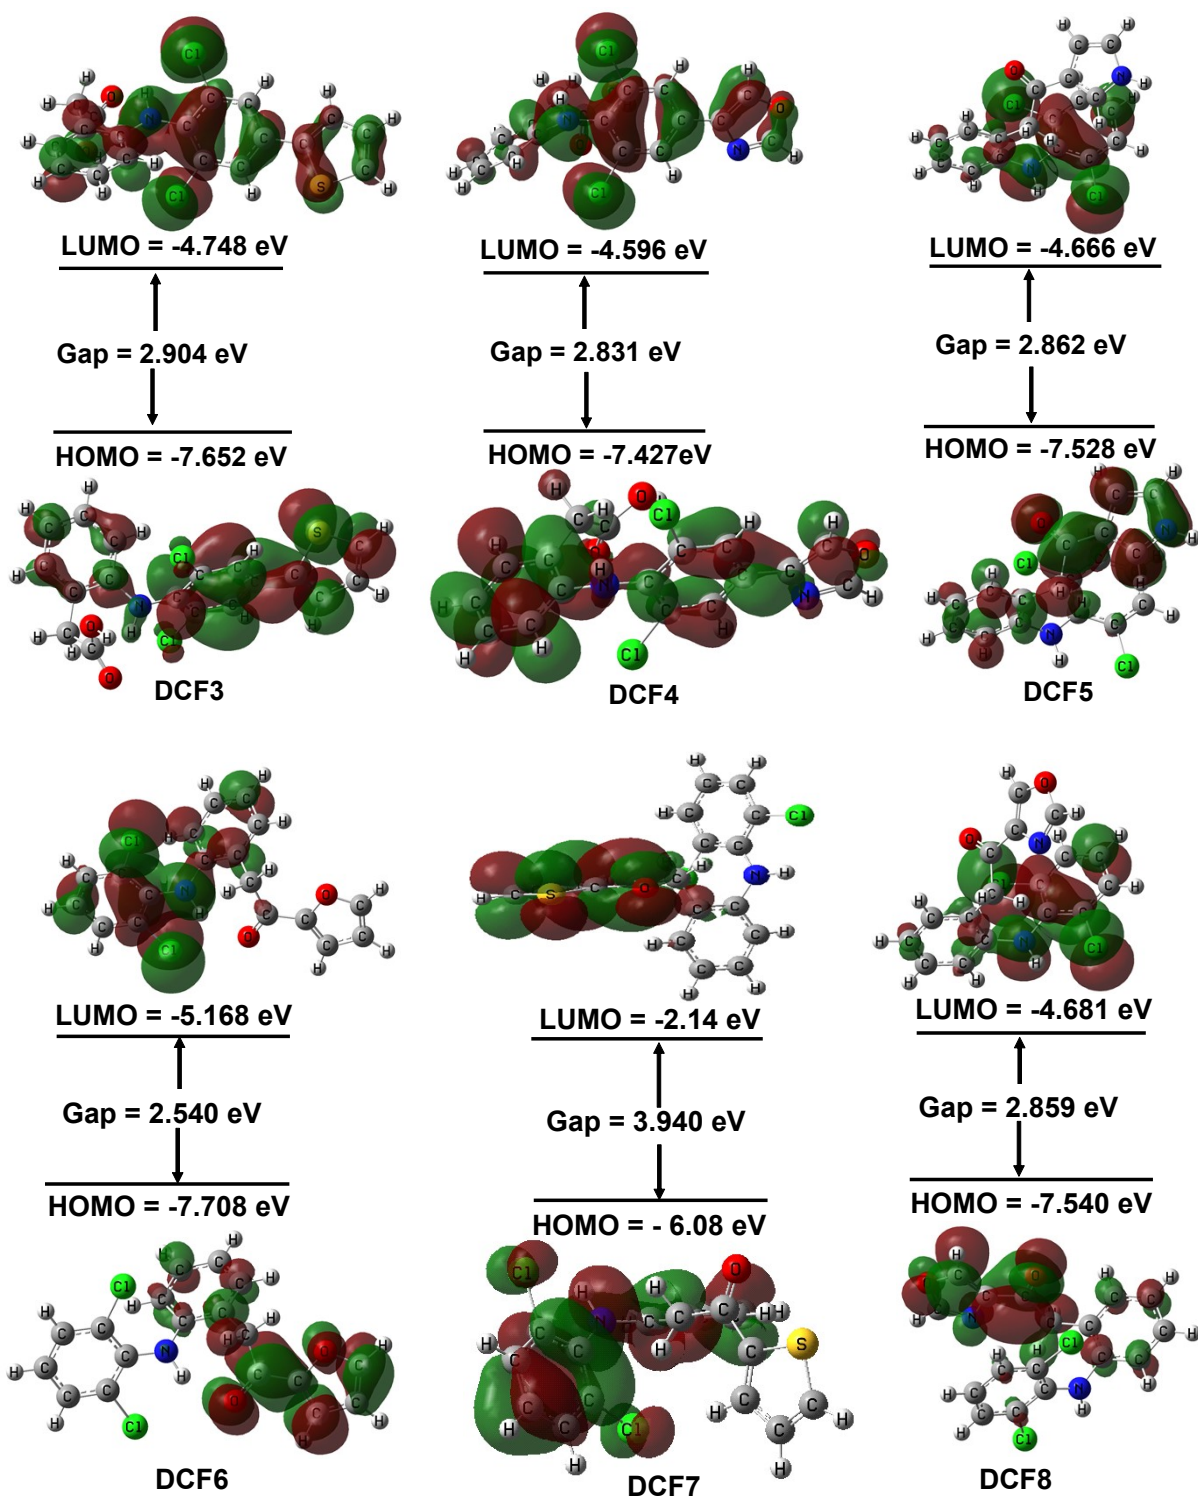

Figure S2 Molecular orbital map of DCF and its derivatives.

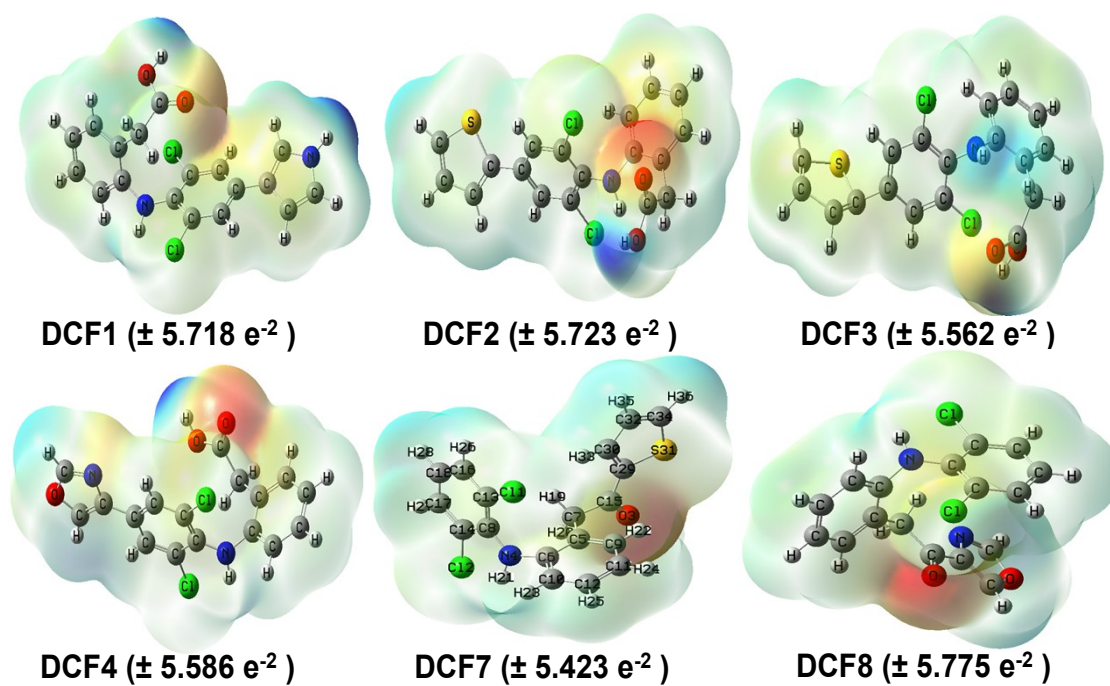

Figure S3 Molecular electrostatic potential map of the rest analogues.

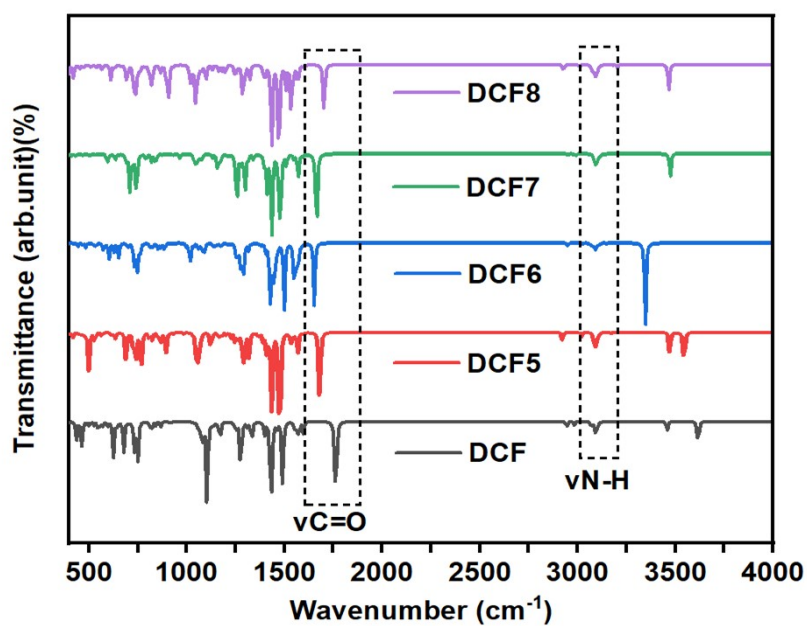

Figure S4 FT-IR spectra of DCF and its rest analogues.

Table S4 Vibrational frequencies of all compounds

| Compound | Assignment             | Calculated at DFT/B3LYP                 |                            |
|----------|------------------------|-----------------------------------------|----------------------------|
|          |                        | Scaled frequency<br>(cm <sup>-1</sup> ) | Experimentally<br>reported |
| DCF      | $\nu$ O-H              | 3617                                    | 3600-3650                  |
|          | $\nu$ N-H              | 3457                                    | 3300-3500                  |
|          | $\nu$ C-H <sup>a</sup> | 3090                                    | 3000-3100                  |
|          | $\nu$ C=O              | 1763                                    | 1690-1720                  |
|          | $\nu$ C=C <sup>a</sup> | 1550-1597                               | 1450-1600                  |
| DCF1     | $\nu$ O-H              | 3625                                    | 3600-3650                  |
|          | $\nu$ N-H              | 3555-3584                               | 3300-3500                  |
|          | $\nu$ C-H <sup>a</sup> | 3088                                    | 3000-3100                  |
|          | $\nu$ C=O              | 1748                                    | 1690-1720                  |
|          | $\nu$ C=C <sup>a</sup> | 1593                                    | 1450-1600                  |
| DCF2     | $\nu$ O-H              | 3617                                    | 3600-3650                  |
|          | $\nu$ N-H              | 3456                                    | 3300-3500                  |
|          | $\nu$ C-H <sup>a</sup> | 3093                                    | 3000-3100                  |
|          | $\nu$ C=O              | 1763                                    | 1690-1720                  |
|          | $\nu$ C=C <sup>a</sup> | 1597                                    | 1450-1600                  |
| DCF3     | $\nu$ O-H              | 3625                                    | 3600-3650                  |
|          | $\nu$ N-H              | 3461                                    | 3300-3500                  |
|          | $\nu$ C-H <sup>a</sup> | 3066                                    | 3000-3100                  |
|          | $\nu$ C=O              | 1744                                    | 1690-1720                  |
|          | $\nu$ C=C <sup>a</sup> | 1573                                    | 1450-1600                  |
| DCF4     | $\nu$ O-H              | 3619                                    | 3600-3650                  |
|          | $\nu$ N-H              | 3470                                    | 3300-3500                  |
|          | $\nu$ C-H <sup>a</sup> | 3079                                    | 3000-3100                  |
|          | $\nu$ C=O              | 1759                                    | 1690-1720                  |
|          | $\nu$ C=C <sup>a</sup> | 1587                                    | 1450-1600                  |
| DCF5     | $\nu$ N-H              | 3471-3545                               | 3300-3500                  |
|          | $\nu$ C-H <sup>a</sup> | 3090                                    | 3000-3100                  |
|          | $\nu$ C=O              | 1681                                    | 1690-1720                  |
|          | $\nu$ C=C <sup>a</sup> | 1569                                    | 1450-1600                  |
| DCF6     | $\nu$ N-H              | 3346                                    | 3300-3500                  |
|          | $\nu$ C-H <sup>a</sup> | 3174                                    | 3000-3100                  |
|          | $\nu$ C=O              | 1653                                    | 1690-1720                  |

|      |                                   |      |           |
|------|-----------------------------------|------|-----------|
|      | $\nu\text{C}=\text{C}^{\text{a}}$ | 1573 | 1450-1600 |
| DCF7 | $\nu\text{N}-\text{H}$            | 3474 | 3300-3500 |
|      | $\nu\text{C}-\text{H}^{\text{a}}$ | 3092 | 3000-3100 |
|      | $\nu\text{C}=\text{O}$            | 1665 | 1690-1720 |
|      | $\nu\text{C}=\text{C}^{\text{a}}$ | 1571 | 1450-1600 |
| DCF8 | $\nu\text{N}-\text{H}$            | 3466 | 3300-3500 |
|      | $\nu\text{C}-\text{H}^{\text{a}}$ | 3089 | 3000-3100 |
|      | $\nu\text{C}=\text{O}$            | 1762 | 1690-1720 |
|      | $\nu\text{C}=\text{C}^{\text{a}}$ | 1569 | 1450-1600 |

[a=aromatic ring]

Table S5 Electronic absorption of DCF and its newly designed analogs.

| Name | Excited state         | Wavelength (nm) | Excitation energy (eV) | Configuration composition (%) | Oscillator strength (f) |
|------|-----------------------|-----------------|------------------------|-------------------------------|-------------------------|
| DCF  | $S_0 \rightarrow S_1$ | 284             | 4.35                   | H $\rightarrow$ L (82.90)     | 0.0499                  |
| DCF1 | $S_0 \rightarrow S_1$ | 795             | 1.56                   | H $\rightarrow$ L (90.14)     | 0.0173                  |
| DCF2 | $S_0 \rightarrow S_1$ | 472             | 2.62                   | H $\rightarrow$ L (97.35)     | 0.0038                  |
| DCF3 | $S_0 \rightarrow S_1$ | 342             | 3.63                   | H $\rightarrow$ L (97.31)     | 0.4817                  |
| DCF4 | $S_0 \rightarrow S_1$ | 329             | 3.77                   | H $\rightarrow$ L (96.87)     | 0.3558                  |
| DCF5 | $S_0 \rightarrow S_1$ | 411             | 3.06                   | H $\rightarrow$ L (88.36)     | 0.0015                  |
| DCF6 | $S_0 \rightarrow S_1$ | 428             | 2.89                   | H $\rightarrow$ L (97.79)     | 0.0333                  |
| DCF7 | $S_0 \rightarrow S_1$ | 665             | 1.86                   | H $\rightarrow$ L (94.42)     | 0.0816                  |
| DCF8 | $S_0 \rightarrow S_1$ | 379             | 3.27                   | H $\rightarrow$ L (99.01)     | 0.0004                  |

Table S6 Binding affinity and nonbonding interactions of all compounds with the receptor protein.

| Name | Binding affinity<br>(kcal/ mol) | Residue in contact | Interaction type | Bond distance<br>(Å) |
|------|---------------------------------|--------------------|------------------|----------------------|
| DCF  | -6.6                            | ARG120             | CHB              | 2.55                 |
|      |                                 | TYR355             | CHB              | 2.47                 |
|      |                                 | TYR115             | Pi-Pi T-shaped   | 5.09                 |
|      |                                 | VAL89              | Pi-Alkyl         | 4.08                 |
|      |                                 | ILE112             | Pi-Alkyl         | 4.63                 |
| DCF1 | -7.1                            | ARG120             | CHB              | 2.38                 |
|      |                                 | TYR355             | CHB              | 2.58                 |
|      |                                 | TRP100             | Pi-Sigma         | 2.88                 |
|      |                                 | TRP100             | Pi-Pi T-shaped   | 5.36                 |
|      |                                 | TYR115             | Pi-Pi T-shaped   | 5.12                 |
|      |                                 | ILE112             | Pi-Alkyl         | 4.69                 |
|      |                                 | VAL89              | Pi-Alkyl         | 4.08                 |
| DCF2 | -7.3                            | ARG120             | CHB              | 2.59                 |
|      |                                 | ARG120             | CHB              | 2.59                 |
|      |                                 | TYR355             | CHB              | 2.60                 |
|      |                                 | TRP100             | Pi-Sigma         | 2.90                 |
|      |                                 | TYR115             | Pi-Pi T-shaped   | 5.12                 |
|      |                                 | VAL89              | Alkyl            | 4.56                 |
|      |                                 | ILE92              | Alkyl            | 4.13                 |
|      |                                 | LEU93              | Alkyl            | 3.91                 |
|      |                                 | TRP100             | Pi-Alkyl         | 5.31                 |
|      |                                 | ILE112             | Pi-Alkyl         | 4.54                 |
|      |                                 | VAL89              | Pi-Alkyl         | 4.02                 |
|      |                                 | ILE112             | Pi-Alkyl         | 5.32                 |
| DCF3 | -7.5                            | THR212             | CHB              | 2.11                 |
|      |                                 | THR212             | CHB              | 2.69                 |
|      |                                 | PHE210             | CHB              | 2.12                 |
|      |                                 | HIS214             | C                | 2.44                 |
|      |                                 | VAL291             | Pi-Alkyl         | 4.51                 |
|      |                                 | VAL291             | Pi-Alkyl         | 4.51                 |
| DCF4 | -7.0                            | ARG120             | CHB              | 2.29                 |
|      |                                 | ARG120             | C                | 2.38                 |

|      |      |        |                |      |
|------|------|--------|----------------|------|
|      |      | LYS83  | Pi-Cation      | 4.92 |
|      |      | ARG120 | Pi-Cation      | 3.69 |
|      |      | ARG120 | Alkyl          | 4.23 |
|      |      | LEU123 | Alkyl          | 5.06 |
|      |      | LYS83  | Pi-Alkyl       | 5.42 |
|      |      | VAL89  | Pi-Alkyl       | 5.22 |
|      |      | VAL116 | Pi-Alkyl       | 5.00 |
| DCF5 | -6.9 | GLN461 | CHB            | 2.45 |
|      |      | GLY45  | CHB            | 2.58 |
|      |      | GLU465 | CHB            | 2.02 |
|      |      | GLU465 | C              | 3.03 |
|      |      | GLU465 | Pi-Anion       | 3.16 |
|      |      | PRO153 | Pi-Alkyl       | 4.81 |
|      |      | CYS36  | Pi-Alkyl       | 4.99 |
|      |      | CYS47  | Pi-Alkyl       | 4.20 |
|      |      | PRO153 | Pi-Alkyl       | 4.84 |
|      |      | LEU152 | Pi-Alkyl       | 5.32 |
|      |      | LYS468 | Pi-Alkyl       | 4.87 |
| DCF6 | -7.4 | SER119 | CHB            | 2.87 |
|      |      | SER119 | C              | 2.60 |
|      |      | TYR115 | Pi-Pi T-shaped | 5.48 |
|      |      | PRO86  | Pi-Alkyl       | 5.16 |
|      |      | VAL89  | Pi-Alkyl       | 3.97 |
|      |      | VAL89  | Pi-Alkyl       | 4.78 |
|      |      | LEU93  | Pi-Alkyl       | 5.22 |
|      |      | VAL116 | Pi-Alkyl       | 5.30 |
|      |      | ARG120 | Pi-Alkyl       | 5.43 |
| DCF7 | -7.3 | SER119 | CHB            | 2.42 |
|      |      | ARG120 | Pi-Cation      | 4.91 |
|      |      | ILE112 | Alkyl          | 3.83 |
|      |      | TYR115 | Pi-Alkyl       | 4.57 |
|      |      | LEU93  | Pi-Alkyl       | 4.44 |
|      |      | VAL116 | Pi-Alkyl       | 4.41 |
|      |      | ILE112 | Pi-Alkyl       | 4.53 |
|      |      | PRO86  | Pi-Alkyl       | 5.08 |

|      |      |        |          |      |
|------|------|--------|----------|------|
|      |      | VAL89  | Pi-Alkyl | 4.15 |
| DCF8 | -7.2 | GLY135 | CHB      | 2.74 |
|      |      | GLY135 | CHB      | 1.86 |
|      |      | PRO154 | CHB      | 2.29 |
|      |      | PRO156 | CHB      | 2.59 |
|      |      | VAL155 | CHB      | 2.28 |
|      |      | CYS36  | Pi-Alkyl | 4.20 |
|      |      | PRO156 | Pi-Alkyl | 5.43 |
|      |      | CYS36  | Pi-Alkyl | 5.09 |
|      |      | CYS47  | Pi-Alkyl | 4.37 |
|      |      | PRO153 | Pi-Alkyl | 4.55 |

[CHB = Conventional Hydrogen Bond, C = Carbon Hydrogen Bond]

Table S7 Docking score of DCF and its analogs

| Drug | Test 1 | Test 2 | Test 3 | Average | Standard Deviation |
|------|--------|--------|--------|---------|--------------------|
| DCF  | -6.6   | -6.9   | -6.3   | -6.6    | ±0.30              |
| DCF1 | -7.3   | -7.4   | -6.6   | -7.1    | ±0.43              |
| DCF2 | -7.3   | -7.7   | -6.9   | -7.3    | ±0.40              |
| DCF3 | -7.2   | -7.5   | -7.8   | -7.5    | ±0.30              |
| DCF4 | -6.9   | -7.3   | -6.8   | -7.0    | ±0.26              |
| DCF5 | -7.0   | -6.8   | -6.9   | -6.9    | ±0.10              |
| DCF6 | -7.5   | -7.1   | -7.6   | -7.4    | ±0.26              |
| DCF7 | -7.2   | -7.6   | -7.1   | -7.3    | ±0.26              |
| DCF8 | -7.2   | -7.0   | -7.4   | -7.2    | ±0.20              |

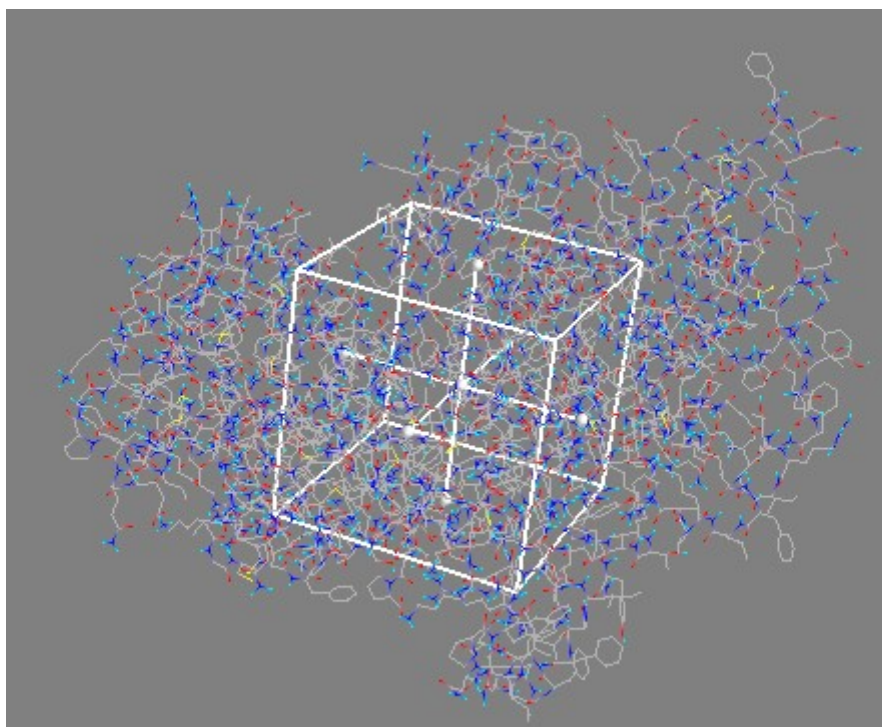

Figure S5: Visual representation of the grid box for site-specific docking in PyRx.

[Dimensions (Angstrom) X: 76.15, Y: 60.46, Z: 64.03]

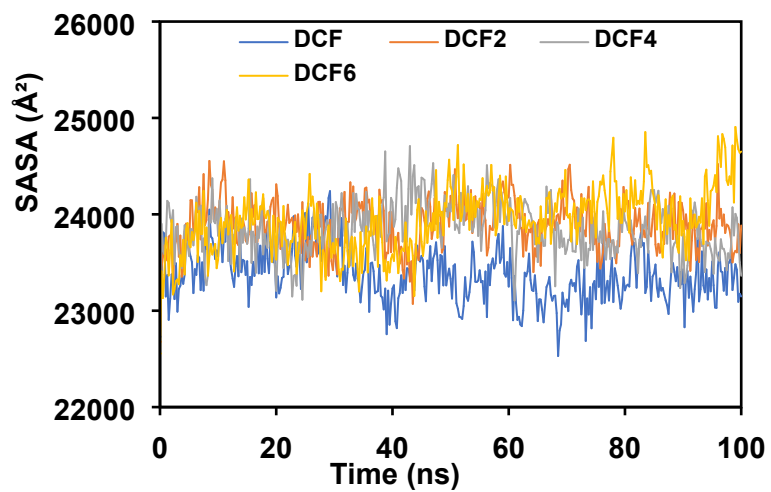

Figure S6 SASA of some DCF-5IKR complexes over 100 ns.

Table S8 Drug likeness parameters of DCF analogues.

| Drug | Lipinski<br>(Violation) | Ghose | Veber | Egan  | Muegge | BAS  | NHD | NHA |
|------|-------------------------|-------|-------|-------|--------|------|-----|-----|
| DCF  | Y (0)                   | Y     | Y     | Y     | Y      | 0.85 | 2   | 2   |
| DCF1 | Y (0)                   | Y     | Y     | Y     | Y      | 0.55 | 3   | 2   |
| DCF2 | Y (0)                   | Y     | Y     | Y     | Y      | 0.55 | 3   | 2   |
| DCF3 | Y (1)                   | N (1) | Y     | N (1) | N (1)  | 0.56 | 2   | 2   |
| DCF4 | Y (0)                   | Y     | Y     | Y     | Y      | 0.56 | 2   | 4   |
| DCF5 | Y (1)                   | N (1) | Y     | N (1) | N (1)  | 0.55 | 1   | 1   |
| DCF6 | Y (0)                   | N (1) | Y     | Y     | N (1)  | 0.55 | 1   | 2   |
| DCF7 | Y (1)                   | Y     | Y     | Y     | N (1)  | 0.55 | 1   | 1   |
| DCF8 | Y (0)                   | Y     | Y     | Y     | Y      | 0.55 | 2   | 3   |

Y=Yes, N = No, BAS = Bio-availability Score, NHD = Number of H-bond Donors, NHA = Number of H-bond Acceptors.

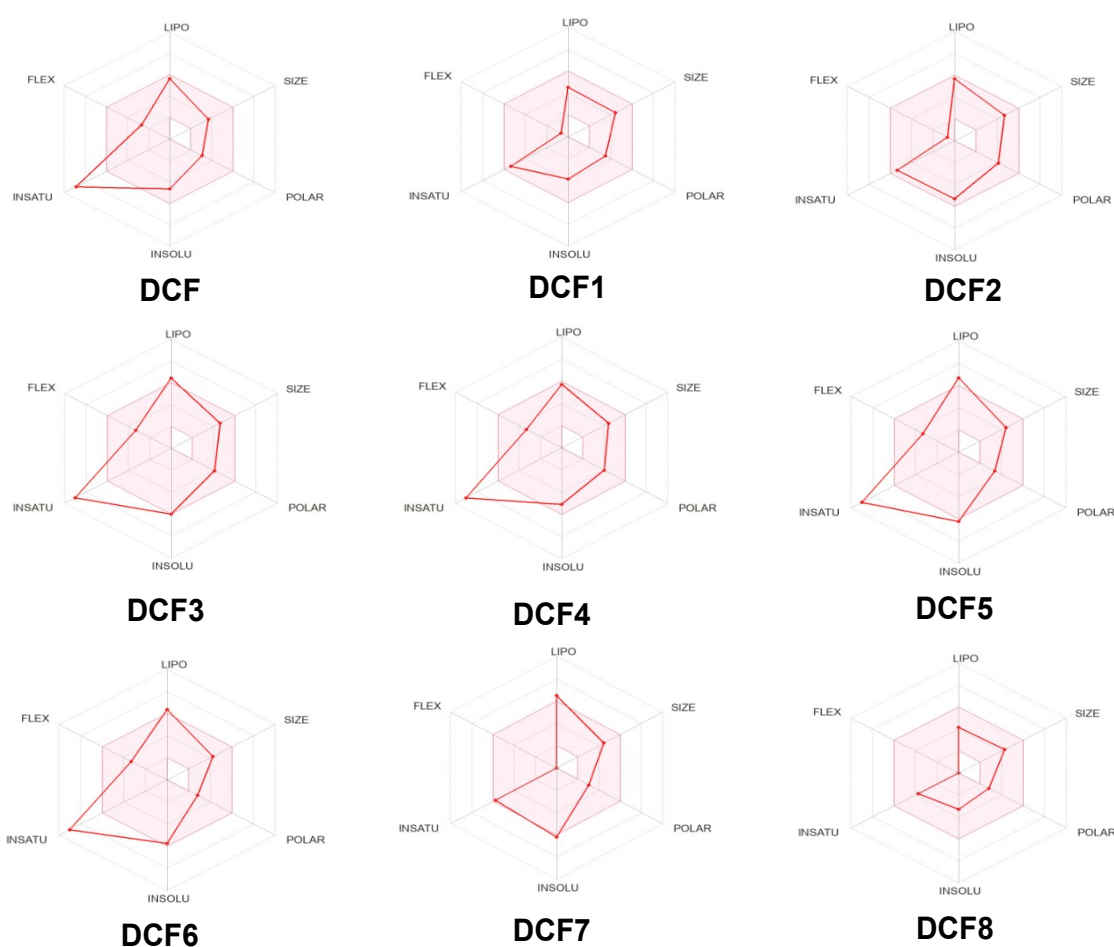

Figure S7 Radar image of DCF and its analogues.

Table S9 Quantitative structure-activity relationship study of DCF and its newly designed derivatives

| Name | Chiv5 | Bcutm1 | MRVSA9 | MRVSA6 | PEOEVSA5 | GATsv4 | J     | Diametert | pIC <sub>50</sub> |
|------|-------|--------|--------|--------|----------|--------|-------|-----------|-------------------|
| DCF  | 1.344 | 4.039  | 40.546 | 58.073 | 47.467   | 0.956  | 1.936 | 9.0       | 3.93              |
| DCF1 | 1.888 | 4.077  | 40.546 | 70.467 | 41.401   | 0.835  | 1.571 | 12.0      | 4.25              |
| DCF2 | 2.283 | 4.235  | 51.883 | 69.520 | 47.467   | 0.791  | 1.571 | 12.0      | 4.30              |
| DCF3 | 2.283 | 4.235  | 51.883 | 69.520 | 47.467   | 0.791  | 1.571 | 12.0      | 4.30              |
| DCF4 | 1.820 | 4.075  | 40.546 | 64.531 | 41.401   | 0.869  | 1.571 | 12.0      | 4.24              |
| DCF5 | 1.682 | 4.041  | 40.360 | 82.097 | 47.467   | 1.105  | 1.566 | 11.0      | 4.24              |
| DCF6 | 2.085 | 4.202  | 51.883 | 62.898 | 41.401   | 0.817  | 1.571 | 12.0      | 4.24              |
| DCF7 | 1.960 | 4.207  | 51.697 | 80.463 | 53.534   | 1.432  | 1.566 | 11.0      | 4.35              |
| DCF8 | 1.607 | 4.041  | 40.360 | 76.424 | 47.467   | 0.878  | 1.566 | 11.0      | 4.26              |

Note for Table S9:

Chiv5: A molecular descriptor that reflects the Chi molecular shape index, which gauges how complicated a molecule's shape is in connection to its atomic distribution. It offers information about how molecular stiffness or flexibility affects molecular interactions and bioactivity.

bcutm1: A descriptor that measures molecular attributes associated with a molecule's graph structure using the biological coarse-grained unit tensor (BCUT) approach. It exhibits symmetry and compactness, both of which are crucial for comprehending the interactions and behavior of molecules.

MRVSA9: The Molecular Refractivity and Volume Surface Area descriptor quantifies the volume and surface area of a molecule. It is frequently employed to assess the influence of a molecule's size and shape on its bioavailability and interaction with biological targets.

MRVSA6: The surface area of a molecule provides the basis for another MRVSA index. This characteristic aids in determining how a compound's surface area, size, and shape affect its ability to interact with biomolecules or receptors, which is crucial for drug design.

PEOEVSA5: The distribution of electrostatic potential across the surface of a molecule is represented by the Partial Electrostatic Surface Area (PEOEVSA) descriptor. It provides information about solubility and bioactivity by assessing the polarity of the molecule and its capacity to interact with biological receptors.

GATSV4: The spatial distribution of molecular properties (such as charge or dipole moment) throughout the entire molecule is measured by Geary's Autocorrelation of the Lagged Molecular Property (v4) descriptor. It aids in understanding the spatial interactions among multiple molecular components, which is essential for predicting biological activity.

J: The Jaccard Similarity Coefficient: This quantifies the resemblance between two collections, namely molecular descriptors. It is used to compare molecules and assess their structural similarity, and is frequently employed in virtual screening or similarity-based drug design.

Diametert: Denotes the diameter of the molecule, representing the maximum distance between any two atoms within the molecule. This descriptor quantifies the molecule's dimensions and density, which is crucial for comprehending its compatibility with binding sites and interactions with receptors.

pIC<sub>50</sub>: The negative logarithm of the IC<sub>50</sub> value (in mol/L), with IC<sub>50</sub> denoting the concentration of a substance necessary to inhibit 50% of a biological activity. A higher pIC<sub>50</sub> value signifies increased potency and serves as a measure of the compound's efficacy in blocking a particular biological function.
